# Supplementary material for: Integrated conversion of 1-butanol to 1,3-butadiene
Source: Royal Society of Chemistry journal article supplement (doi:10.1039/c8ra02977f), 2018-01-01
Supplement: c8ra02977f1.pdf [file c8ra02977f1.pdf]

## Integrated Conversion of 1-butanol to 1,3-Butadiene

Jacob S. Kruger\*, Tao Dong, Gregg T. Beckham, Mary J. Bidy

*National Renewable Energy Laboratory, National Bioenergy Center, 15013 Denver West  
Parkway, Golden, CO 80401*

\*Corresponding Author; e-mail: [Jacob.Kruger@nrel.gov](mailto:Jacob.Kruger@nrel.gov); Fax: +01-303-384-6363; Tel: +01-303-275-4081.

### Supporting Information

#### Contents

|                                                                                                                                                     |   |
|-----------------------------------------------------------------------------------------------------------------------------------------------------|---|
| Temperature profile in reactor tube (Figure S1) .....                                                                                               | 2 |
| Butene dehydrogenation control reaction product distribution (Figure S2) .....                                                                      | 2 |
| Yield over Ni- and Mo-doped Cr <sub>2</sub> O <sub>3</sub> /Al <sub>2</sub> O <sub>3</sub> catalysts at different dopant loadings (Figure S3) ..... | 3 |
| Selectivity to butadiene over 1 wt%-doped Cr <sub>2</sub> O <sub>3</sub> /Al <sub>2</sub> O <sub>3</sub> catalysts (Figure S4) .....                | 3 |
| Activity comparison in N <sub>2</sub> , CO <sub>2</sub> , and H <sub>2</sub> O-rich atmospheres (Figure S5) .....                                   | 4 |
| Carbon balance and products in integrated dehydration-dehydrogenation (Figure S6) .....                                                             | 4 |
| Phase composition of catalysts (Figure S7) .....                                                                                                    | 5 |

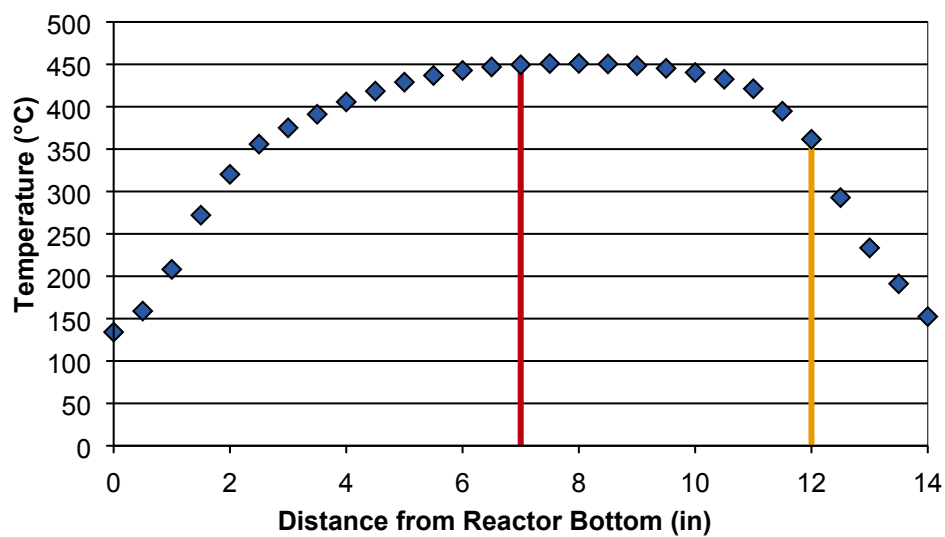

**Figure S1.** Temperature profile in dehydration-dehydrogenation reactor, including position of  $\text{K-Cr}_2\text{O}_3/\text{Al}_2\text{O}_3$  (red) and  $\gamma\text{-Al}_2\text{O}_3$  (yellow) catalyst beds.

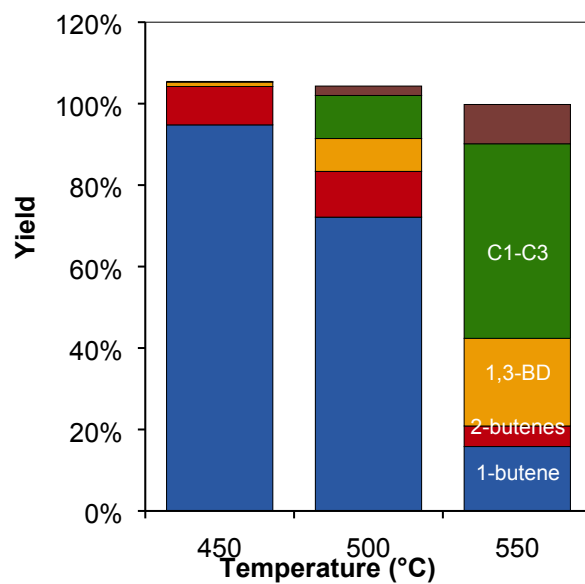

**Figure S2.** Control reaction of butene through  $\text{SiO}_2$ -packed reactor tube. Conditions: 100 sccm 5.4 mol% 1-butene in  $\text{N}_2$ .

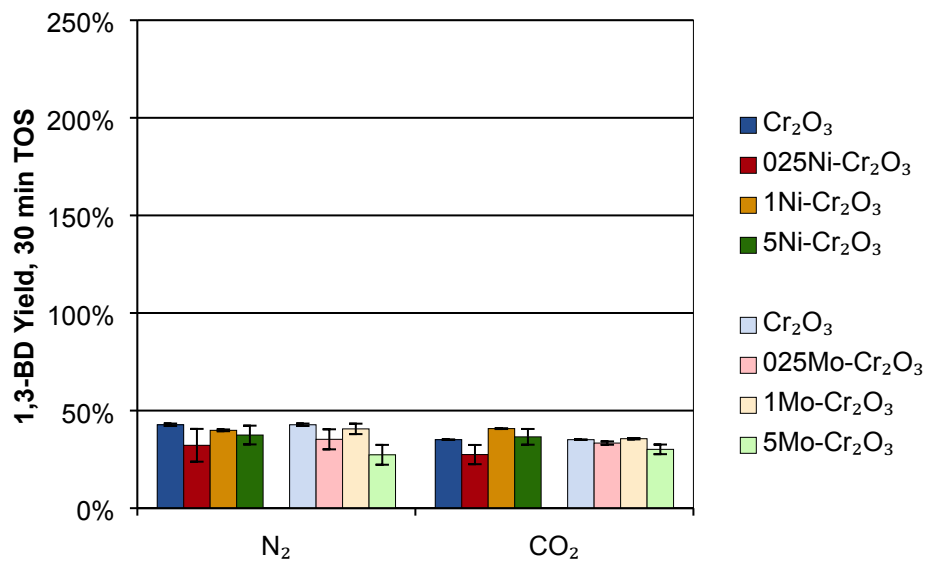

Figure S3. Single-pass butadiene yields over Ni- and Mo-doped  $\text{Cr}_2\text{O}_3/\text{Al}_2\text{O}_3$  catalysts at different dopant loadings and 30 min time-on-stream.

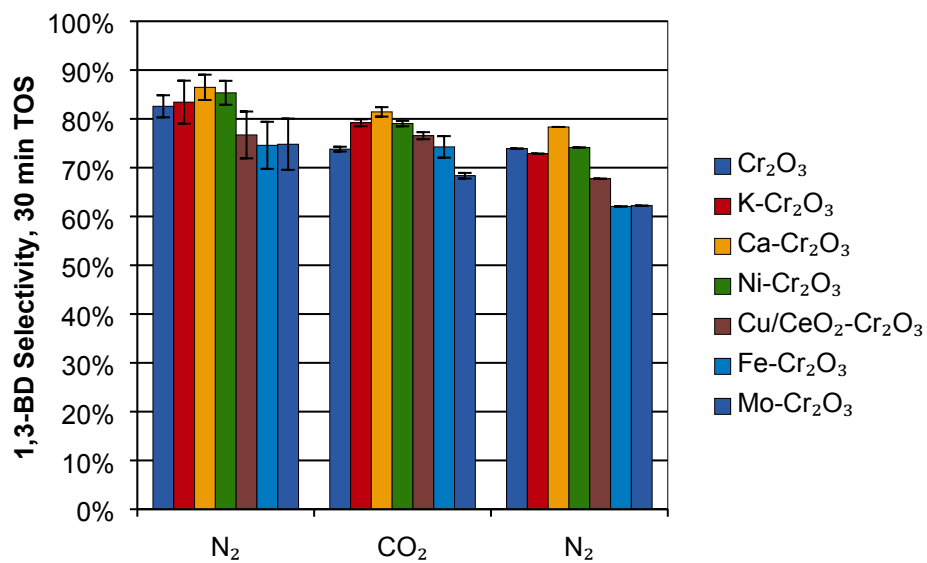

Figure S4. Selectivity to 1,3-Butadiene over 1 wt% doped  $\text{Cr}_2\text{O}_3/\text{Al}_2\text{O}_3$  catalysts at 30 min time-on-stream.

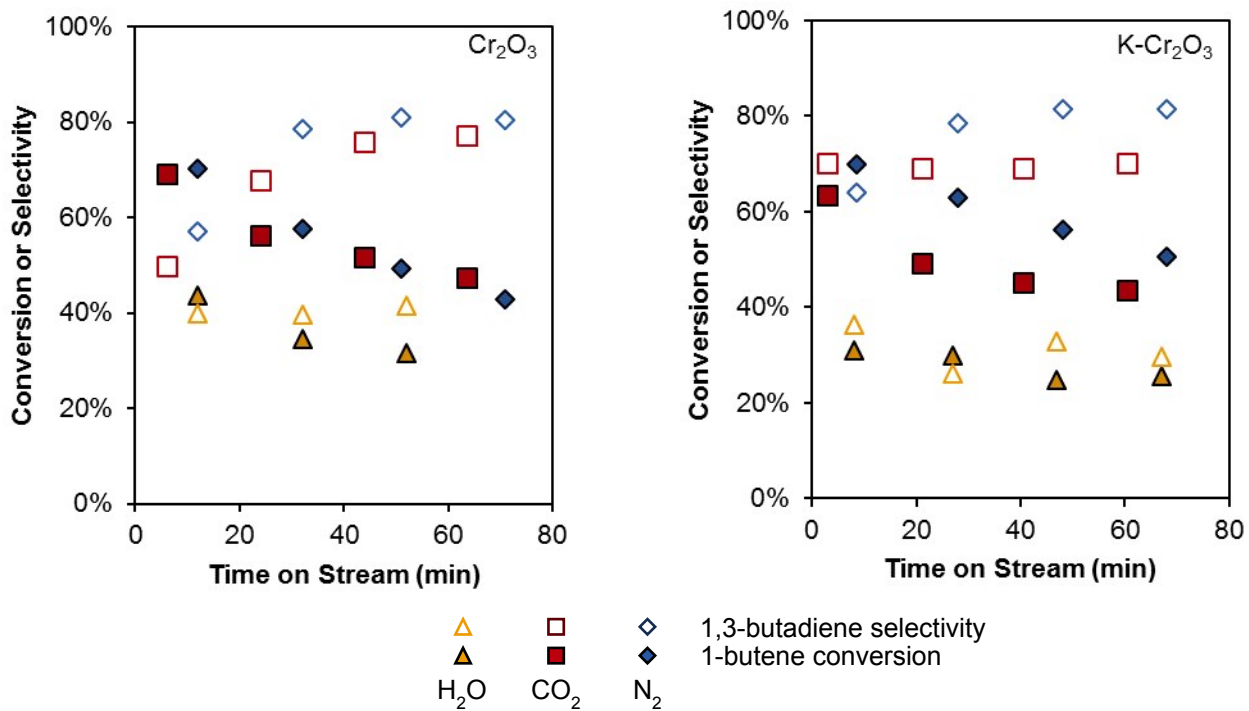

Figure S5. Activity comparison of  $\text{Cr}_2\text{O}_3/\text{Al}_2\text{O}_3$  and  $\text{K-Cr}_2\text{O}_3/\text{Al}_2\text{O}_3$  catalyst in  $\text{N}_2$ , with 50%  $\text{N}_2$ ,  $\text{CO}_2$ , and  $\text{H}_2\text{O}$  co-feeds.

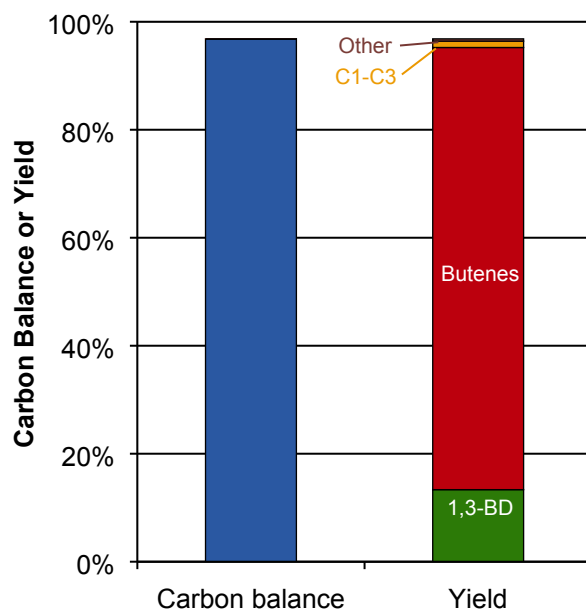

Figure S6. Average carbon balance and yield to various product classes in integrated conversion of butanol to 1,3-butadiene over 10 h TOS.

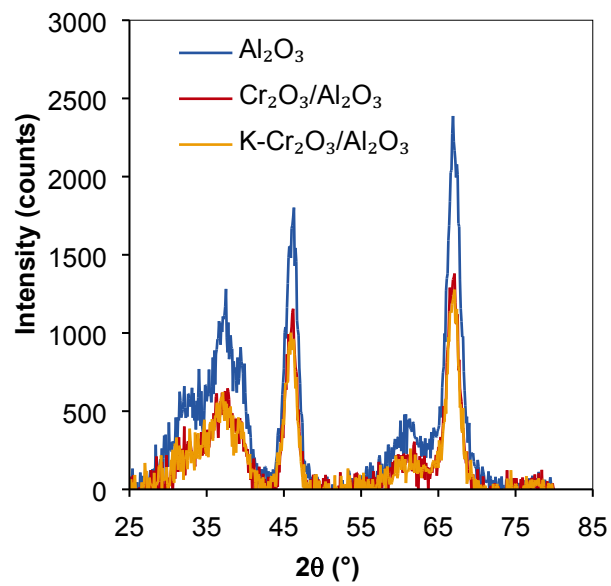

**Figure S7.** XRD diffractograms for catalysts synthesized in this work.
